# Supplementary material for: Targeting implant-associated infections: titanium surface loaded with antimicrobial
Source: PubMed Central journal article supplement — iScience. 2020 Dec 29;24(1):102008. doi: 10.1016/j.isci.2020.102008 (PMC7811145; doi:10.1016/j.isci.2020.102008), 2020-12-29
Supplement: mmc1.pdf [file mmc1.pdf]

iScience, Volume 24

## **Supplemental Information**

**Targeting implant-associated infections:  
titanium surface loaded with antimicrobial**

**João Gabriel Silva Souza, Martinna Mendonça Bertolini, Raphael Cavalcante Costa, Bruna Egumi Nagay, Anna Dongari-Bagtzoglou, and Valentim Adelino Ricardo Barão**

## **Transparent Methods**

### **Materials and methods**

This systematic review was conducted in order to answer the following focused question: “*Do antibiotic-loaded coatings on titanium surface reduce long-term peri-implant infection?*”. This study was performed according to PRISMA statement recommendations for the report of systematic reviews.

### **Search strategy**

An extensive literature search was performed among six electronic databases up to May 9, 2020: PubMed (MEDLINE), Scopus, Web of Science, The Cochrane Library, and Embase. The grey literature was also searched by the System for Information on Grey Literature in Europe (SIGLE) through the OpenGrey. The entire electronic strategy was developed with MeSH terms/entry terms and free terms appropriately combine by boolean operators (OR; AND) and adapted for each database (Please see Supplemental material – Table S1, related Figure 6). The present systematic review and the search strategy was developed with no language and publication time restriction. A manual screening of the reference list of all included studies was performed, preventing any missing articles. Expert authors were contacted for information of ongoing studies and not published data. Additionally, to keep the search strategy up-to-date, alerts were established for each database.

### **Eligibility criteria**

For the systematic review, the studies had to meet the following inclusion criteria: (a) to evaluate antibiotic-loaded coatings on Ti based-material implants; (b) to have a control group with untreated implants or not loaded with antibiotic; (c) to report primary outcomes related to microbial assessment such as biofilm/microbial load (quantitative data) and implant contamination rate. Studies not meeting the inclusion criteria were excluded. Additionally, the studies designated as literature reviews, case reports, case series, in vitro, in silico, descriptive and observational were also excluded. The PICO strategy described below was used:

- (P) – Population: humans or animals with Ti based-implants;
- (I) – Intervention: surface treatment with antibiotic on Ti implants clearly described;
- (C) – Comparison: control (not treated/loaded with antibiotic) implants; and,

(O) – Outcome: biofilm load (bacterial counts, area covered by biofilm, bioluminescence intensity, biovolume or plaque index) and implant contamination rate (bacterial presence).

### **Study selection**

References recorded identified through all databases were imported to Mendeley reference manager (Mendeley Desktop, v1.19.4; Elsevier). Duplicate entries were excluded according to authors' names, the titles of references and year of publication. After elimination of duplicate entries, two reviewers (R. C. C. and B. E. N.) independently screened all titles and abstracts for possible inclusion. In cases of insufficient information provided in papers' abstracts, the full paper was read to evaluate its eligibility. Subsequently, full texts of the remaining papers were analyzed and those that met the inclusion criteria were included. The agreement between the two reviewers regarding the titles and abstracts selection as well as full text was evaluated by Cohen's kappa coefficient ( $\kappa$ ). Any disagreements were resolved by discussion and a third author (J. G. S. S.) was consulted to reach a consensus about eligibility.

### **Data extraction process**

Data from the included studies were independently recorded: study features (author(s) and year of publication), animal (species, n value and infection presence), implant information (Ti based-material, surgical site, surface treatment, antibiotic load), time of follow-up, peri-implant infection rate, drug concentration loaded in the surface, in vitro drug release, and microbiological tests characterized by mean and standard deviation. In case of missing data, the corresponding authors were contacted via institutional e-mail and ResearchGate<sup>®</sup> website. Some papers from the same study were associated under a single report (the most recent publication). For available data only in graphs with no mean and standard deviation exact values, data were extracted using the program WebPlotDigitizer which is considered a reliable tool for data extraction (Burda et al., 2016).



|                                                                                                                                                                                                                                                                                                                                                                                                                                                                                                                                                                                                                                                                                                                                                                                                                                                             |                                                                                                                                                                                                                                                                                                                                                                                                                                                                                                                                                                                                                                                                                                                                                                                                                                                                                                                                                                                                                                                                                                                                                                                                           |  |                                                                                                                                                                                                                                                                                                                                                                                                                                                                                                                                                                                                                                                                                                                                                                                                                                                                                                                                                                                                                                                                                                                                                                                                                                                                                               |                                                                                                                                                                                                                                                                                                                                                                                                                                                                                                                                                                                                                                                     |  |
|-------------------------------------------------------------------------------------------------------------------------------------------------------------------------------------------------------------------------------------------------------------------------------------------------------------------------------------------------------------------------------------------------------------------------------------------------------------------------------------------------------------------------------------------------------------------------------------------------------------------------------------------------------------------------------------------------------------------------------------------------------------------------------------------------------------------------------------------------------------|-----------------------------------------------------------------------------------------------------------------------------------------------------------------------------------------------------------------------------------------------------------------------------------------------------------------------------------------------------------------------------------------------------------------------------------------------------------------------------------------------------------------------------------------------------------------------------------------------------------------------------------------------------------------------------------------------------------------------------------------------------------------------------------------------------------------------------------------------------------------------------------------------------------------------------------------------------------------------------------------------------------------------------------------------------------------------------------------------------------------------------------------------------------------------------------------------------------|--|-----------------------------------------------------------------------------------------------------------------------------------------------------------------------------------------------------------------------------------------------------------------------------------------------------------------------------------------------------------------------------------------------------------------------------------------------------------------------------------------------------------------------------------------------------------------------------------------------------------------------------------------------------------------------------------------------------------------------------------------------------------------------------------------------------------------------------------------------------------------------------------------------------------------------------------------------------------------------------------------------------------------------------------------------------------------------------------------------------------------------------------------------------------------------------------------------------------------------------------------------------------------------------------------------|-----------------------------------------------------------------------------------------------------------------------------------------------------------------------------------------------------------------------------------------------------------------------------------------------------------------------------------------------------------------------------------------------------------------------------------------------------------------------------------------------------------------------------------------------------------------------------------------------------------------------------------------------------|--|
| <p>(calvaria*[Title/Abstract]) OR<br/> (calvarium[Title/Abstract]) OR<br/> (femur[Title/Abstract]) OR (jaw[Title/Abstract])<br/> OR (mandible*[Title/Abstract]) OR<br/> (palat*[Title/Abstract]) OR<br/> (fibula*[Title/Abstract]) OR<br/> (zygoma*[Title/Abstract]) OR (in<br/> vivo[Title/Abstract]) OR (((((((((((in<br/> situ[Title/Abstract]) OR (clinical[Title/Abstract])<br/> OR (randomized[Title/Abstract])) OR<br/> (nonrandomized[Title/Abstract]) OR (non-<br/> randomized[Title/Abstract])) OR<br/> (trial[Title/Abstract]) OR (intervention<br/> stud*[Title/Abstract]) OR (follow<br/> up[Title/Abstract]) OR (follow-<br/> up*[Title/Abstract]) OR<br/> (patient*[Title/Abstract]) OR<br/> (human[Title/Abstract]) OR<br/> (volunteer*[Title/Abstract]) OR (quasi-<br/> experimental[Title/Abstract])))</p> <p><b>#1 AND #2 AND #3</b></p> | <p>KEY (rabbit*) OR TITLE-ABS-<br/> KEY ("dog") OR TITLE-ABS-<br/> KEY ("dogs") OR TITLE-ABS-<br/> KEY ("canine") OR TITLE-ABS-<br/> KEY (goat*) OR TITLE-ABS-<br/> KEY (monkey*) OR TITLE-ABS-<br/> KEY (tibia*) OR TITLE-ABS-<br/> KEY ("radius") OR TITLE-ABS-<br/> KEY (subcutaneous*) OR TITLE-ABS-<br/> KEY (calvaria*) OR TITLE-ABS-<br/> KEY ("calvarium") OR TITLE-ABS-<br/> KEY ("femur") OR TITLE-ABS-<br/> KEY ("jaw") OR TITLE-ABS-<br/> KEY (mandible*) OR TITLE-ABS-<br/> KEY (palat*) OR TITLE-ABS-<br/> KEY (fibula*) OR TITLE-ABS-<br/> KEY (zygoma*) OR TITLE-ABS-KEY ("in<br/> vivo") OR TITLE-ABS-KEY ("in<br/> situ") OR TITLE-ABS-<br/> KEY ("clinical") OR TITLE-ABS-<br/> KEY ("randomized") OR TITLE-ABS-<br/> KEY ("nonrandomized") OR TITLE-ABS-<br/> KEY ("non-randomized") OR TITLE-ABS-<br/> KEY ("trial") OR TITLE-ABS-<br/> KEY ("intervention study") OR TITLE-ABS-<br/> KEY ("intervention studies") OR TITLE-ABS-<br/> KEY ("follow up") OR TITLE-ABS-<br/> KEY (follow-up*) OR TITLE-ABS-<br/> KEY (patient*) OR TITLE-ABS-<br/> KEY ("human") OR TITLE-ABS-<br/> KEY (volunteer*) OR TITLE-ABS-<br/> KEY ("quasi-experimental"))</p> <p><b>#1 AND #2 AND #3</b></p> |  | <p><b>#12</b> MeSH descriptor: [Animals,<br/> Laboratory] explode all trees</p> <p><b>#13</b> MeSH descriptor: [Animals]<br/> explode all trees</p> <p><b>#14</b> (animal*):ti,ab,kw OR<br/> (rat):ti,ab,kw (rats):ti,ab,kw OR<br/> (mice):ti,ab,kw OR (mouse):ti,ab,kw<br/> OR (murine):ti,ab,kw<br/> (rodent*):ti,ab,kw OR (pig):ti,ab,kw<br/> OR (pigs):ti,ab,kw OR<br/> (rabbit*):ti,ab,kw (dog):ti,ab,kw OR<br/> (dogs):ti,ab,kw OR (canine):ti,ab,kw<br/> OR (goat*):ti,ab,kw<br/> (monkey*):ti,ab,kw OR<br/> (tibia*):ti,ab,kw OR (radius):ti,ab,kw<br/> OR (subcutaneous*):ti,ab,kw<br/> (calvaria*):ti,ab,kw OR<br/> (calvarium):ti,ab,kw OR<br/> (femur):ti,ab,kw OR (jaw):ti,ab,kw<br/> (mandible*):ti,ab,kw OR<br/> (palat*):ti,ab,kw OR<br/> (fibula*):ti,ab,kw OR<br/> (zygoma*):ti,ab,kw (in vivo):ti,ab,kw<br/> OR (in situ):ti,ab,kw OR<br/> (clinical):ti,ab,kw OR<br/> (randomized):ti,ab,kw OR<br/> (nonrandomized):ti,ab,kw (non-<br/> randomized):ti,ab,kw OR<br/> (trial):ti,ab,kw OR (intervention<br/> stud*):ti,ab,kw OR (follow<br/> up):ti,ab,kw (follow-up*):ti,ab,kw<br/> OR (patient*):ti,ab,kw OR<br/> (human):ti,ab,kw OR<br/> (volunteer*):ti,ab,kw OR (quasi-<br/> experimental):ti,ab,kw</p> <p><b>#15 #9 OR #10 OR #11 OR<br/> #12 OR #13 OR #14</b></p> | <p>calvaria*:ti,ab,kw OR<br/> calvarium:ti,ab,kw OR<br/> femur:ti,ab,kw OR jaw:ti,ab,kw<br/> OR mandible*:ti,ab,kw OR<br/> palat*:ti,ab,kw OR<br/> fibula*:ti,ab,kw OR<br/> zygoma*:ti,ab,kw OR 'in<br/> vivo':ti,ab,kw OR 'in<br/> situ':ti,ab,kw OR clinical:ti,ab,kw<br/> OR randomized:ti,ab,kw OR<br/> nonrandomized:ti,ab,kw OR 'non<br/> randomized':ti,ab,kw OR<br/> trial:ti,ab,kw OR 'intervention<br/> stud*':ti,ab,kw OR 'follow<br/> up':ti,ab,kw OR 'follow<br/> up*':ti,ab,kw OR<br/> patient*:ti,ab,kw OR<br/> human:ti,ab,kw OR<br/> volunteer*:ti,ab,kw OR 'quasi<br/> experimental':ti,ab,kw)</p> <p><b>#1 AND #2 AND #3</b></p> |  |
|-------------------------------------------------------------------------------------------------------------------------------------------------------------------------------------------------------------------------------------------------------------------------------------------------------------------------------------------------------------------------------------------------------------------------------------------------------------------------------------------------------------------------------------------------------------------------------------------------------------------------------------------------------------------------------------------------------------------------------------------------------------------------------------------------------------------------------------------------------------|-----------------------------------------------------------------------------------------------------------------------------------------------------------------------------------------------------------------------------------------------------------------------------------------------------------------------------------------------------------------------------------------------------------------------------------------------------------------------------------------------------------------------------------------------------------------------------------------------------------------------------------------------------------------------------------------------------------------------------------------------------------------------------------------------------------------------------------------------------------------------------------------------------------------------------------------------------------------------------------------------------------------------------------------------------------------------------------------------------------------------------------------------------------------------------------------------------------|--|-----------------------------------------------------------------------------------------------------------------------------------------------------------------------------------------------------------------------------------------------------------------------------------------------------------------------------------------------------------------------------------------------------------------------------------------------------------------------------------------------------------------------------------------------------------------------------------------------------------------------------------------------------------------------------------------------------------------------------------------------------------------------------------------------------------------------------------------------------------------------------------------------------------------------------------------------------------------------------------------------------------------------------------------------------------------------------------------------------------------------------------------------------------------------------------------------------------------------------------------------------------------------------------------------|-----------------------------------------------------------------------------------------------------------------------------------------------------------------------------------------------------------------------------------------------------------------------------------------------------------------------------------------------------------------------------------------------------------------------------------------------------------------------------------------------------------------------------------------------------------------------------------------------------------------------------------------------------|--|

**TABLE S2** - Summary of excluded studies, related to the main text and Figure 6.

| Reason for exclusion                                                       | Number | Studies                                                                                                                                                                                                                                                                                                                                                               |
|----------------------------------------------------------------------------|--------|-----------------------------------------------------------------------------------------------------------------------------------------------------------------------------------------------------------------------------------------------------------------------------------------------------------------------------------------------------------------------|
| Does not used titanium-based implants                                      | 2      | Bernthal et al. (2010); Jennings et al. (2015)                                                                                                                                                                                                                                                                                                                        |
| Does not evaluate microbial colonization quantitatively on implant surface | 18     | Vester et al. (2010); Norowski et al. (2011); Stewart et al. (2012); Qu et al. (2014); Walter et al. (2014); Zhang et al. (2014); Nast et al. (2016); Li et al. (2017, 2018, 2020); Schmidmaier et al. (2017); Wan et al. (2017); Sutrisno et al. (2018); Li et al. (2019); Qian et al. (2019); Williams et al. (2019); Sumathra et al. (2020); Yavari et al. (2020). |
| Microbiological evaluation in bone tissue only                             | 4      | Moojen et al. (2009); Yang et al. (2013); Ma et al. (2017); Boot et al. (2020).                                                                                                                                                                                                                                                                                       |
| Human study without control group                                          | 1      | Fuchs et al. (2011)                                                                                                                                                                                                                                                                                                                                                   |
| Unavailable full text                                                      | 2      | Liu et al. (2016); Wang et al. (2017)                                                                                                                                                                                                                                                                                                                                 |
| Other reasons                                                              | 6      | Ren et al. (2014); Liu et al. (2016); Nast et al. (2016a); Nast et al. (2016b); Qu et al. (2016); Zhang et al. (2018).                                                                                                                                                                                                                                                |

## REFERENCES

Bernthal, N.M., Stavrakis, A.I., Billi, F., et al. (2010). A mouse model of post-arthroplasty *Staphylococcus aureus* joint infection to evaluate in vivo the efficacy of antimicrobial implant coatings. *PLoS One*. 5, e12580.

Burda, B.U., O'Connor, E.A., Webber, et al. (2017). Estimating data from figures with a web-based program: considerations for a systematic review. *Res. Synth. Methods* 8, 258–262.

Boot, W., Vogely, H.C., Jiao, C., et al. (2020). Prophylaxis of implant-related infections by local release of vancomycin from a hydrogel in rabbits. *Eur Cell Mater*. 39, 108-120.

Fuchs, T., Stange, R., Schmidmaier, G., Raschke, M.J. (2011). The use of gentamicin-coated nails in the tibia: preliminary results of a prospective study. *Arch Orthop Trauma Surg*. 131,1419-1425.

Jennings, J.A., Carpenter, D.P., Troxel, K.S., et al. (2015). Novel Antibiotic-loaded Point-of-care Implant Coating Inhibits Biofilm. *Clin Orthop Relat Res*. 473, 2270-2282.

Li, D., Lv, P., Fan, L., et al. (2017). The immobilization of antibiotic-loaded polymeric coatings on osteoarticular Ti implants for the prevention of bone infections. *Biomater Sci*. 5,2337-2346.

Li, H., Nie, B., Zhang, S., Long, T., Yue, B. (2019). Immobilization of type I collagen/hyaluronic acid multilayer coating on enoxacin loaded titania nanotubes for improved osteogenesis and osseointegration in ovariectomized rats. *Colloids Surf B Biointerfaces*. 175,409-420.

Li, Y., Li, L., Ma, Y., et al. (2020). 3D-Printed Titanium Cage with PVA-Vancomycin Coating Prevents Surgical Site Infections (SSIs). *Macromol Biosci.* 20, e1900394.

Ding, L., Zhang, P., Wang, X., et al. (2019) Effect of doxycycline-treated hydroxyapatite surface on bone apposition: A histomorphometric study in murine maxillae. *Dent Mater J.* 37, 130-138.

Ma, K., Cai, X., Zhou, Y., Wang, Y., Jiang, T. (2017). In Vitro and In Vivo Evaluation of Tetracycline Loaded Chitosan-Gelatin Nanosphere Coatings for Titanium Surface Functionalization. *Macromol Biosci.* 17, 10.1002/mabi.201600130.

Moojen, D.J., Vogely, H.C., Flee, A., et al. (2009). Prophylaxis of infection and effects on osseointegration using a tobramycin-apatite coating on titanium implants--an experimental study in the rabbit. *J Orthop Res.* 27, 710-716.

Nast, S., Fassbender, M., Bormann, N., et al. (2016). In vivo quantification of gentamicin released from an implant coating. *J Biomater Appl.* 31, 45-54.

Nast, S., Fassbender, M., Bormann, N., et al. (2016). Quantification and analysis of local gentamicin release in vitro and in an animal model. *J Orthop Res.* 34, 157.

Norowski, P.A., Courtney, H.S., Babu, J., Haggard, W.O., Bumgardner, J.D. (2011). Chitosan coatings deliver antimicrobials from titanium implants: a preliminary study. *Implant Dent.* 20, 56-67.

Qiu, J., Qian, W., Zhang, J., Chen, D. et al. (2019). Minocycline hydrochloride loaded graphene oxide enables enhanced osteogenic activity in the presence of Gram-positive bacteria, *Staphylococcus aureus*. *J. Mater. Chem. B.* 7, 3590-3598.

Qu, H., Knabe, C., Burke, M., et al. (2014). Bactericidal micron-thin sol-gel films prevent pin tract and periprosthetic infection. *Mil Med.* 179(8 Suppl), 29-33.

Qu, H. (2016). Micron-Thin Bactericidal sol-gel films for the treatment of periprosthetic infection—a 3-month ovine study. *J Orthop Res.* 34, 112.

Ren, W., Song, W., Markel D. (2014). Implant Infection Was Controlled by Sustained Release of Doxycyclin From a Nanofiber Coating. *Tissue Eng Part A* 20, S-4.

Qian, W., Qiu, J., Liu, X. (2020). Minocycline hydrochloride-loaded graphene oxide films on implant abutments for peri-implantitis treatment in beagle dogs. *J Periodontol.* 2020;91(6):792-799.

Stewart, S., Barr, S., Engiles, J., et al. (2012). Vancomycin-modified implant surface inhibits biofilm formation and supports bone-healing in an infected osteotomy model in sheep: a proof-of-concept study. *J Bone Joint Surg Am.* 94,1406-1415.

Sutrisno, L., Wang, S., Li, M., et al. (2018). Construction of three-dimensional net-like polyelectrolyte multilayered nanostructures onto titanium substrates for combined antibacterial and antioxidant applications. *J. Mater. Chem. B.* 6, 5290-5302.

Sumathra, M., Rajan, M., Praphakar, R.A., Marraiki, N., Elgorban, M. A. (2020). In Vivo Assessment of a Hydroxyapatite/ $\kappa$ -Carrageenan–Maleic Anhydride–Casein/Doxorubicin Composite-Coated Titanium Bone Implant. *ACS Biomater. Sci. Eng.* 6, 1650–1662.

Schmidmaier, G., Kerstan, M., Schwabe, P., Südkamp, N., Raschke, M. (2017). Clinical experiences in the use of a gentamicin-coated titanium nail in tibia fractures. *Injury.* 48, 2235-2241.

Vester, H., Wildemann, B., Schmidmaier, G., Stöckle, U., Lucke, M. (2010). Gentamycin delivered from a PDLLA coating of metallic implants: In vivo and in vitro characterisation for local prophylaxis of implant-related osteomyelitis. *Injury.* 41, 1053-1059.

Walter, M.S., Frank, M.J., Satué, M., et al. (2014). Bioactive implant surface with electrochemically bound doxycycline promotes bone formation markers in vitro and in vivo. *Dent Mater.* 30, 200-214.

Wan, M., Zhang, J., Wang, Q., et al. (2017). In Situ Growth of Mesoporous Silica with Drugs on Titanium Surface and Its Biomedical Applications. *ACS Appl Mater Interfaces.* 9, 18609-18618.

Wang, Y., Wan, Y., Zhang X., Ye, J., Zhuo, N. (2017). Titanium intramedullary nail coated with vancomycin-hydroxyapatite in a model of open long bone fracture with wound infection. *Chinese J Tissue Eng Res.* 21, 2163-2169.

Williams, D.L., Epperson, R.T., Ashton, N.N., et al. (2019). In vivo analysis of a first-in-class tri-alkyl norspermidine-biaryl antibiotic in an active release coating to reduce the risk of implant-related infection. *Acta Biomater.* 93, 36-49.

Yang, C.C., Lin, C.C., Liao, J.W., Yen, S.K. (2013). Vancomycin-chitosan composite deposited on post porous hydroxyapatite coated Ti6Al4V implant for drug controlled release. *Mater Sci Eng C Mater Biol Appl.* 33, 2203-2212.



Yavari, S.A., Croes M., Akhavan, B. et al. (2020). Layer by layer coating for bio-functionalization of additively manufactured meta-biomaterials. *Additive Manufacturing*. 32, 100991.

Zhang, L., Yan, J., Yin, Z., et al. (2014). Electrospun vancomycin-loaded coating on titanium implants for the prevention of implant-associated infections. *Int J Nanomedicine*. 9,3027-3036.

Zhang, S., Cheng, X., Shi, J., et al. (2018b). Electrochemical Deposition of CalciumPhosphate/Chitosan/Gentamicin on a Titanium Alloy for Bone Tissue Healing. *Int J Electrochem Sci*. 13, 4046 – 4054.
